# Supplementary material for: Mucosa-associated lymphoid tissue lymphoma translocation 1 as a novel therapeutic target for rheumatoid arthritis
Source: PubMed Central journal article supplement (PMC5605699; doi:10.1038/s41598-017-12349-9), 2017-09-19
Supplement: 41598_2017_12349_MOESM1_ESM.pdf [file 41598_2017_12349_MOESM1_ESM.pdf]

## **Supplementary Information**

### **Mucosa-associated lymphoid tissue lymphoma translocation 1 as a novel therapeutic target for rheumatoid arthritis**

Chang Hoon Lee\*, Su Jeong Bae and Miok Kim

**Supplementary figure 1: Immunoblot analysis of MALT-1 in human monocytes.**

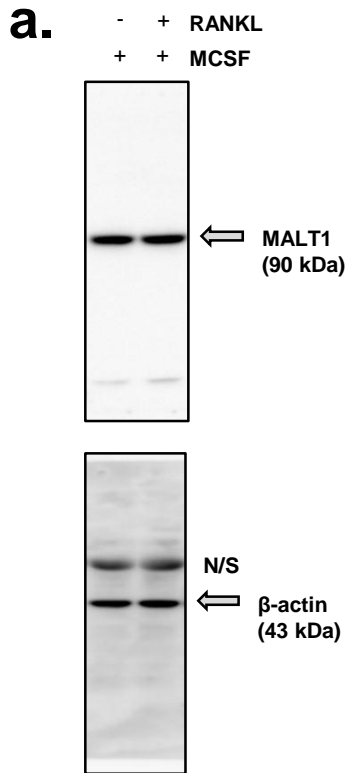

(a) Human monocytes were used to assess the expression of MALT1 using immunoblot method with a use of  $\beta$ -actin as a loading control. Human monocytes were incubated in differentiation medium (20 ng/mL M-CSF and 50 ng/mL RANKL in  $\alpha$ -MEM containing 10% FBS). The level of  $\beta$ -actin was analysed as a loading control. N/S indicates non-specific band.

**Supplementary figure 2: Immunoblot analysis of p-IKK  $\alpha/\beta$ , IKK $\alpha$ , p-IkBa, IkBa, p-p65 and p65 in human monocytes.**

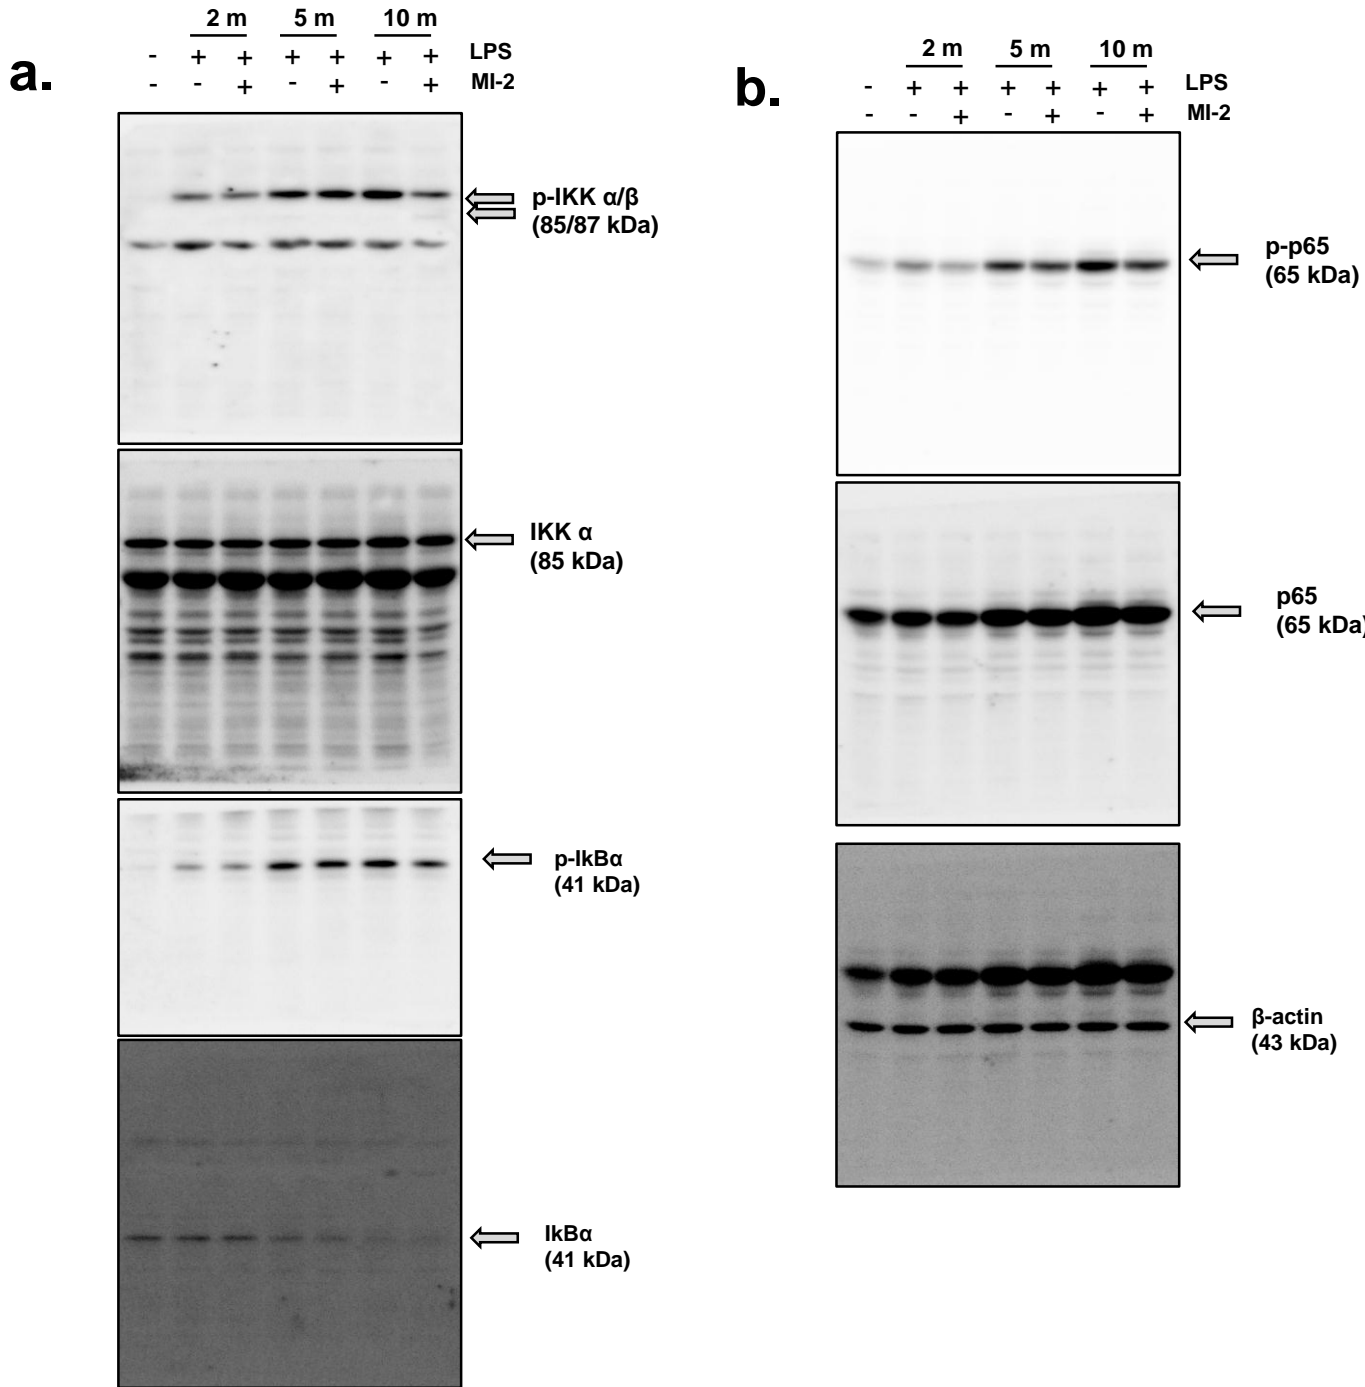

(a) Human monocytes were incubated in differentiation medium (20 ng/mL M-CSF and 10 ng/mL LPS in  $\alpha$ -MEM containing 10% FBS) in the presence or absence of MI-2. Human monocytes were used to assess the expression of p-IKK  $\alpha/\beta$ , IKK $\alpha$ , p-IkBa and IkBa using immunoblot method with a use of  $\beta$ -actin as a loading control. (b) Protein expression in the cell lysates was analysed by immunoblot analysis with antibodies p-p65 and p65 against. The level of  $\beta$ -actin was analysed as a loading control. N/S indicates non-specific band.

**Supplementary figure 3: Immunoblot analysis of A20 in human monocytes.**

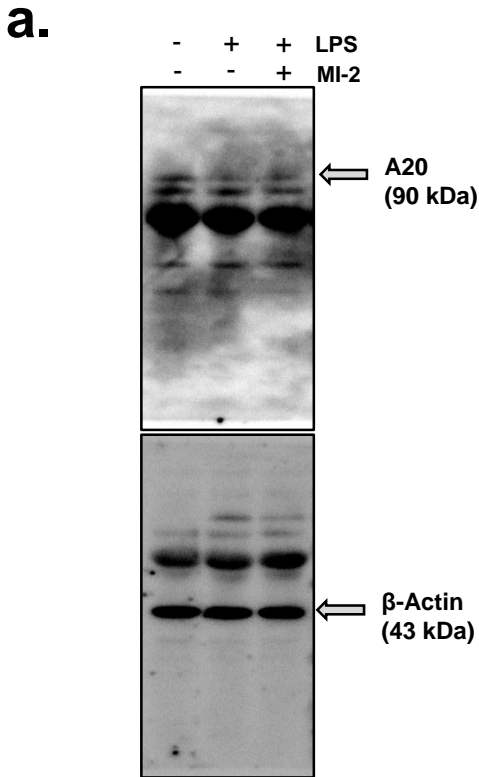

(a) Human monocytes were incubated in differentiation medium (20 ng/mL M-CSF and 10 ng/mL LPS in  $\alpha$ -MEM containing 10% FBS) in the presence or absence of MI-2. Human monocytes were used to assess the expression of A20 using immunoblot method with a use of  $\beta$ -actin as a loading control. The level of  $\beta$ -actin was analysed as a loading control. N/S indicates non-specific band.

**Supplementary figure 4: Immunoblot analysis of MALT1, A20, and p-IKK  $\alpha/\beta$  in human monocytes.**

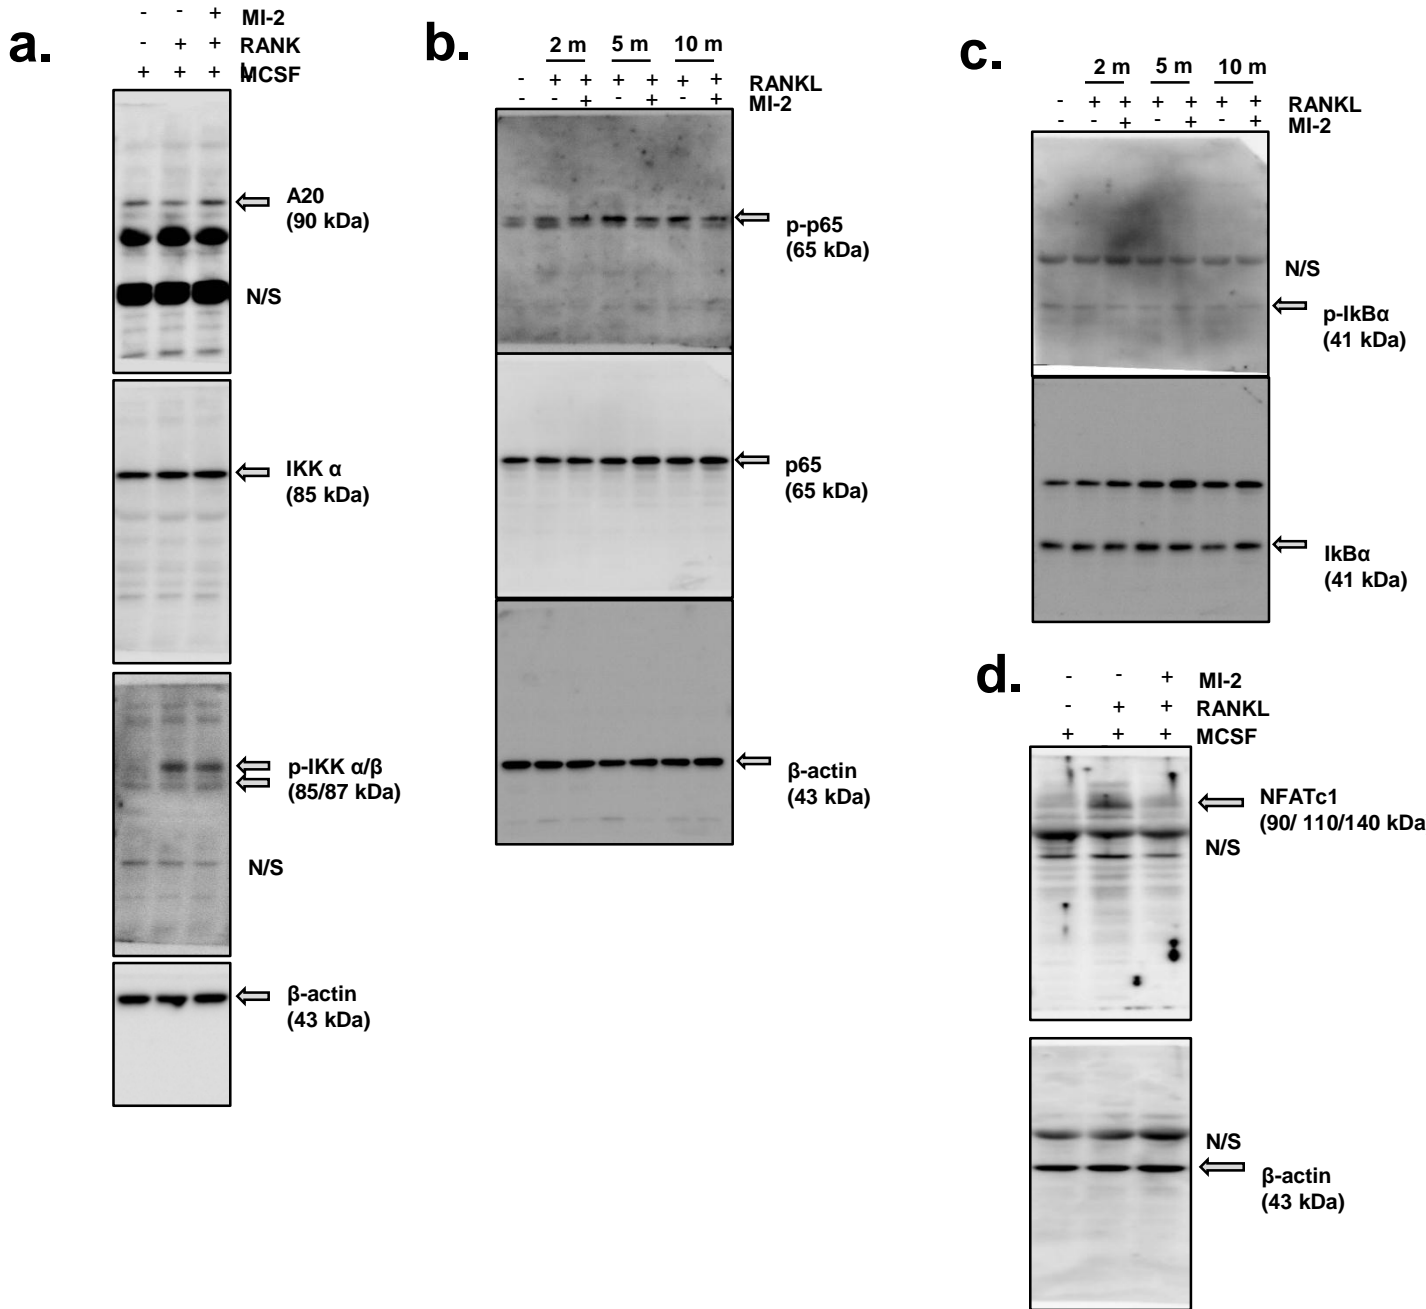

(a) Human monocytes were incubated in differentiation medium (20 ng/mL MCSF and 50 ng/mL RANKL in  $\alpha$ -MEM containing 10% FBS) in the presence or absence of MI-2. Protein expression in the cell lysates was analysed by immunoblot analysis with antibodies against p A20 and phosphor-IKK  $\alpha/\beta$  and IKK  $\alpha$ . (b) Human monocytes were incubated with stimulation of 50 ng/mL RANKL in the presence or absence of MI-2 for indicated time durations. Cell lysates from human monocytes were used to assesses the level of phosphor-p65 and expression of p65 and (c) to assesses the level of phosphor-IkBa and expression of IkBa using immunoblot method with a use of  $\beta$ -actin as a loading control. (d) Protein expression in the cell lysates was analysed by immunoblot analysis with antibodies against p NFATc1. The level of  $\beta$ -actin was analysed as a loading control. N/S indicates non-specific band.
